1 **COVID-19 vaccination status is associated with physical activity in German-speaking**  
2 **countries: the COR-PHYS-Q cohort study**

3 Schwendinger F.<sup>a</sup>, Boeck H. T.<sup>b</sup>, Infanger D.<sup>a</sup>, Faulhaber M.<sup>c</sup>, Tegtbur U.<sup>b#</sup> & Schmidt-  
4 Trucksäss A.<sup>a\*,#</sup>

5 <sup>a</sup>Division of Sports and Exercise Medicine, Department of Sport, Exercise and Health,  
6 University of Basel, 4052 Basel, Switzerland

7 <sup>b</sup>Institute of Sports Medicine, Hannover Medical School, 30625 Hannover, Germany

8 <sup>c</sup>Medical Section, Department of Sport Science, University of Innsbruck, 6020 Innsbruck,  
9 Austria

10 # Uwe Tegtbur and Arno Schmidt-Trucksäss share senior authorship

11

12 \* Corresponding author.

13 E-mail address: [arno.schmidt-trucksass@unibas.ch](mailto:arno.schmidt-trucksass@unibas.ch) (A. Schmidt-Trucksäss).

14

15 Word count: 2893

16

17 **Abstract**

18 *Background:* To examine the association between COVID-19 vaccination status and physical  
19 activity (PA), sporting behavior, as well as barriers to PA in adults in Switzerland, Germany,  
20 and Austria.

21 *Methods:* A total of 1516 adults provided complete responses to our online questionnaire sent  
22 out in August 2021. Information about self-reported PA categories, sporting behavior, barriers  
23 to PA, and COVID-19 vaccination status were gathered. Main analyses were done using  
24 multiple linear regression adjusted for relevant parameters.

25 *Results:* We found a significant association of vaccination status with total PA ( $p = .011$ ),  
26 vigorous PA ( $p = .015$ ), and moderate PA ( $p = .001$ ) but not transport-related PA or sedentary  
27 time. Unvaccinated adults tended to have more total and vigorous PA than those vaccinated  
28 once (ratios of geometric means: 1.34 and 1.60, respectively) or twice (1.22 and 1.09,  
29 respectively). Yet, not sufficient evidence was available to confirm this. There was no between-  
30 group difference in the contribution of leisure time, work-related, or transport-related PA to  
31 total PA. Vaccination status was not associated with sporting behavior except for jogging as  
32 the primary intensive type of sports. Finally, there were no significant differences in any of the  
33 COVID-19 specific barriers to PA between groups.

**NOTE:** This preprint reports new research that has not been certified by peer review and should not be used to guide clinical practice.

34 *Conclusion:* Our data showed that vaccination status is associated with PA even in summer,  
35 where the number of COVID-19 cases was low and the severity of safety measures was mild.  
36 These findings may enhance future research and improve/extend COVID-19-specific PA  
37 guidelines.

38

39 *Keywords:* locomotion; SARS-nCoV-2; sedentary behavior; social distance; vaccine

40

## 41 **1. Introduction**

42 Safety measures enacted by the governments to prevent the spread of SARS-nCoV-2 have led  
43 to impaired levels of physical activity (PA) and more sedentary time in the general population.<sup>1</sup>  
44 Changes in PA patterns are an important research area as both the amount and intensity of PA  
45 are closely connected to the risk for cardiovascular disease and all-cause mortality.<sup>2, 3</sup>  
46 Moreover, physical inactivity causes an enormous financial burden for healthcare systems<sup>4</sup> that  
47 may have even increased during this pandemic.

48 There are clear recommendations by health organizations (e.g. World Health Organization<sup>5</sup>,  
49 US Centers for Disease Control and Prevention<sup>6</sup>) to carry out regular PA while abiding by  
50 public health safety measures in pandemic times. PA is a potent stimulus improving immune  
51 function, physical and mental health, as well as wellbeing.<sup>7</sup> A study of 48,440 adult patients  
52 found that following PA guidelines was strongly linked to a lower risk of severe COVID-19  
53 course.<sup>8</sup> Further, Campbell & Turner<sup>9</sup> concluded that evidence from epidemiological studies  
54 points towards a physically active lifestyle lowering the incidence of communicable (e.g.  
55 bacterial and viral infections) and non-communicable diseases (e.g. cancer). This means that  
56 regular exercise improves immune competence.<sup>9</sup>

57 To date, several potent vaccines to protect against COVID-19 are available.<sup>10-12</sup> From mid-  
58 January of this year (2021), mass vaccination was initiated in Switzerland, Germany, and  
59 Austria, as a result of which more than 51% of the population were fully vaccinated in August  
60 2021.<sup>13</sup> Progress with vaccinations has also led to the implementation of new regulations.  
61 Certain facilities could only be visited if individuals provided proof of either a current negative  
62 COVID-19 test result or of being fully vaccinated or recovered. These measures vary in their  
63 severity according to the number of new SARS-nCoV-2 infections and hospitalizations.

64 It may be speculated that fully vaccinated people and those that recovered from COVID-19 are  
65 less restricted in their PA than those who are not vaccinated. The availability of a vaccine might  
66 therefore help increase PA in the general population.<sup>14</sup> Nonetheless, differences in PA might

67 not be apparent in the summer months since the safety measures in place were looser<sup>15</sup> and the  
68 number of infections was clearly below the current ones (08.08.2021, 13 cases per million  
69 people vs. 29.11.2021, 935 cases per million people<sup>16</sup>).

70 There are no studies available to date shedding light on these issues. Thus, we conducted the  
71 first transnational prospective observational study to examine the association between COVID-  
72 19 vaccination status and PA patterns, sporting behavior, and PA barriers in adults in German-  
73 speaking countries.

74

## 75 **2. Methods**

### 76 *2.1 Study design*

77 COR-PHYS-Q is a prospective observational study that is conducted at three points in time,  
78 i.e. during two weeks in August 2021, December 2021, and August 2022, respectively. The  
79 abbreviation stands for linking CORonavirus disease 2019 and PHYSical activity using a  
80 Questionnaire.

81

### 82 *2.2 Setting*

83 Data were collected using an online questionnaire distributed via e-mail, social media and  
84 popular mobile apps, websites, online-newspaper articles, and mouth-to-mouth. The present  
85 study focused on the data obtained during survey round one from 9<sup>th</sup> to 23<sup>rd</sup> August 2021. The  
86 project was approved by the responsible ethics committees in Switzerland (EKNZ 2021-  
87 00775), Germany (9863\_BO\_K\_2021), and Austria (Certificate of good standing 51/2021).  
88 All procedures followed the Declaration of Helsinki.

89

### 90 *2.3 Study cohort*

91 German-speaking adults ( $\geq 18$  years) living in Switzerland, Germany, or Austria were eligible  
92 for inclusion. Exclusion criteria were being unable to follow the study procedures (e.g.  
93 insufficient knowledge of the study language), mental incapacity, and individuals not having  
94 their primary residence within one of the mentioned countries. We aimed to recruit as many  
95 participants as possible and expected 2000 individuals in the three countries to fill out the  
96 questionnaire. Sample size calculations were done for longitudinal analyses of changes in the  
97 primary outcome, PA patterns, yielding approximately 400 participants.<sup>17</sup> Informed consent  
98 was obtained by all participants prior to participation.

99

100 *2.4 Questionnaire*

101 The online questionnaire was created in German and distributed with Research Electronic Data  
102 Capture (REDCap).<sup>18, 19</sup> It included items gathering information about subject characteristics  
103 (including COVID-19 history and vaccination status), socio-economic data, subjective PA,  
104 barriers to PA, and objectively measured PA.

105 Subjective PA was assessed by the Global Physical Activity Questionnaire (GPAQ) consisting  
106 of 16 items about work, transport and leisure PA as well as sitting time.<sup>20</sup> Weekly metabolic  
107 equivalent of task (MET)-minutes per week were calculated for total PA (TPA), vigorous PA  
108 (VPA), and moderate PA (MPA). Data processing and analyses of the GPAQ were done  
109 according to the guidelines of the World Health Organisation.<sup>21</sup> Of note, previous findings  
110 showed that the use of absolute intensity cut-offs leads to the false classification of PA in  
111 populations other than those the cut-offs were derived from.<sup>22</sup> Thus, age-adjusted MET-values  
112 referring to Garber et al.<sup>23</sup> were used in this study (Table 1).

113

114 \*\*\* insert Table 1 here \*\*\*

115

116 For additional details regarding the type of sports, participants were asked to provide the most  
117 and second most frequent type of sports for both moderate and vigorous intensity. An adapted  
118 version of a questionnaire by Reichert et al.<sup>24</sup> was utilized to gather information about  
119 perceived barriers to PA including three COVID-19-specific items (i.e. the anxiety of infection,  
120 lack of space, and restricted due to safety measures).

121

122 *2.5 Data analysis*

123 Statistics and figures were done in R version 4.0.3 (R Foundation for Statistical Computing,  
124 Vienna, Austria).<sup>25</sup> Vaccination status was categorized as follows: unvaccinated, received first  
125 shot but not fully vaccinated, fully vaccinated, as well as recovered from COVID-19 within  
126 the last 6 months and unvaccinated. For moderate and vigorous PA, a considerable fraction of  
127 participants reported zero activity. Due to the clumping at zero, we used a two-step procedure<sup>26-</sup>  
128 <sup>28</sup> to explore the association between COVID-19 vaccination status and PA patterns. During  
129 the first step, multiple logistic regressions were run with the respective PA pattern as a  
130 dichotomous dependent variable (engaged in PA: yes/no). During the second step, we used  
131 multiple linear regression models on the non-zero part where the log-transformed PA pattern  
132 served as the dependent variable and the dummy-coded categorical vaccination status served  
133 as the focal predictor. To minimize the bias of the estimate of the association between

134 vaccination status and physical activity, we constructed a directed acyclic graph (DAG)<sup>29</sup>  
135 which encodes our assumptions about the causal structure between the variables (see  
136 Supplementary File). Based on this DAG, all our models were adjusted for age, body mass  
137 index, sex (m/f), education level (see Table 1), living with others (yes/no), and area of residence  
138 (city center, suburbs, countryside). Age and body mass index were included with restricted  
139 cubic splines with four knots placed at appropriate percentiles of the data.<sup>30</sup> This was done for  
140 PA patterns where we saw a considerable share of subjects reporting no PA. Residual  
141 diagnostics were used to verify that the model assumptions were satisfied. Pairwise between-  
142 group differences were further examined using pre-planned contrasts which were adjusted for  
143 multiple testing. Because we analyzed PA patterns on the log-scale, the estimated marginal  
144 means of the vaccination status groups represent geometric means. Hence, PA patterns between  
145 vaccination groups were compared using the ratio of their geometric means. Only for sedentary  
146 time we compared vaccination groups using differences between means. Sensitivity analyses  
147 were run for the main analyses additionally including the country of residence as a parameter  
148 in the models. Between-group differences in sporting behavior, as well as frequencies of  
149 perceived barriers to PA, were examined using Pearson's Chi-square test. If any cells had  
150 expected frequencies below 5, Fisher's exact test was used instead. For these tests, the false-  
151 discovery rate was controlled at the 5% level using the Benjamini-Hochberg method.<sup>31</sup>  
152 Subsequently, post-hoc analyses were performed. All tests were two-sided and the statistical  
153 significance level was set to .05.

154

### 155 **3. Results**

#### 156 *3.1 Study cohort*

157 Out of 2454 responses to the questionnaire, 1516 were complete and ended up being included  
158 in the analyses. Subject characteristics stratified by COVID-19 vaccination status are displayed  
159 in Table 2.

160

161 \*\*\* insert Table 2 here \*\*\*

162

#### 163 *3.2 Association between vaccination status and PA patterns*

164 There was little evidence for between-group differences regarding the probability of being  
165 active regarding the respective PA patterns (Table 3).

166 Overall, we found evidence for between-group differences in TPA ( $n = 1478$ ,  $\chi^2(6) = 16.632$ ,  
167  $p = .011$ ), VPA ( $n = 1109$ ,  $\chi^2(6) = 15.819$ ,  $p = .015$ ), and MPA ( $n = 1339$ ,  $\chi^2(6) = 21.764$ ,  $p =$   
168  $.001$ ) (see Table 3). However, there were no significant differences for transport-related PA ( $n$   
169  $= 1062$ ,  $\chi^2(6) = 5.918$ ,  $p = .432$ ; see Table 3) and sedentary time ( $n = 1510$ ,  $\chi^2(6) = 7.512$ ,  $p =$   
170  $.276$ ) between groups (Table 4).

171

172 \*\*\* insert Tables 3 & 4 here \*\*\*

173

### 174 *3.3 Association between vaccination status and contribution of PA category to TPA*

175 The relative contributions of work-, leisure time-, and transport-related PA to TPA were not  
176 significantly different between groups (Supplementary File).

177

### 178 *3.4 Association between vaccination status and sporting behavior*

179 The association of sporting behavior with vaccination status is presented in Figure 1. We found  
180 no evidence for between-group differences in any of the sports categories except for jogging  
181 as the most frequent intensive type of sports ( $p = .027$ ). Individuals that had COVID-19 within  
182 the past six months were significantly different ( $p = .010$ ).

183

184 \*\*\*insert Figure 1 in color on the web only\*\*\*

185

### 186 *3.5 Association between vaccination status and barriers to PA*

187 The results regarding barriers to PA are presented in Figure 2. Significant between-group  
188 differences were found for ‘current injury/disease’ ( $p < .001$ ). Unvaccinated ( $p < .0001$ ) and  
189 fully vaccinated individuals ( $p < .001$ ) differed significantly. No evidence for differences was  
190 found for any of the COVID-19 specific factors.

191

192 \*\*\*insert Figure 2 in color on the web only\*\*\*

193

### 194 *3.6 Sensitivity analyses*

195 Results did not substantially differ when including the country of residence as an additional  
196 predictor into the main models.

197

## 198 **4. Discussion**

199 The major novel findings of this study were that firstly, COVID-19 vaccination status was  
200 associated with TPA, VPA, as well as MPA but not transport-related PA and sedentary time.  
201 Secondly, there was no evidence for a difference in the contribution of PA categories to TPA  
202 between vaccination status. Thirdly, we found no evidence that vaccination status was  
203 associated with sporting behavior except for jogging as a primary type of intense sport. Finally,  
204 between-group differences in barriers to PA were only apparent for ‘current injury/disease’ but  
205 not for COVID-19-specific factors.

206

#### 207 *4.1 Association between vaccination status and PA patterns*

208 Overall, vaccination status is related to TPA, VPA and MPA. These findings are especially  
209 interesting considering that the survey was conducted in August 2021. Then, the occurrence of  
210 infections was low and safety measures were mostly mild, hence not substantially impacting  
211 individuals in their daily activities. In detail, our results indicated that unvaccinated individuals  
212 had higher levels of TPA and VPA but not MPA than individuals vaccinated once. Similar  
213 findings were apparent for TPA, VPA, but not MPA when comparing unvaccinated with fully  
214 vaccinated individuals. Yet, there was not sufficient evidence to verify these findings.  
215 Nonetheless, the discoveries are rather surprising and encourage further research in this area.  
216 Against our original assumption of vaccinated individuals being more engaged in PA due to  
217 being less restricted by safety measures in place and feeling more protected, we propose the  
218 following potential explanation. On one hand, vaccinated individuals might be more prudent  
219 to avoid infection and have different health awareness. On the other hand, unvaccinated  
220 individuals might feel more protected by a better immune system as a consequence of generally  
221 higher PA levels. This could be supported by recent research highlighting the beneficial effect  
222 of PA on the immune response<sup>32, 33</sup> as well as the odds for hospitalization due to COVID-19.<sup>8</sup>  
223 Also notable is that individuals with COVID-19 in the past 6 months engaged in more TPA  
224 than both partly and fully vaccinated individuals. Again, there was not sufficient evidence to  
225 confirm this association. However, for MPA significantly higher levels could be seen than in  
226 fully vaccinated individuals. Thinking of highly prevalent symptoms of post-COVID-19  
227 syndrome<sup>34, 35</sup> such as exercise intolerance and reduced resilience or simply the deconditioning  
228 experienced after a period of bed rest, these individuals might be dedicated to getting back in  
229 shape or counteracting residual symptoms. The abovementioned findings, taken together,  
230 highlight the role of vaccination status as an explanatory variable for changes in PA patterns  
231 in the current situation. Moreover, if these differences in PA should persist over time, health  
232 benefits/detriments for some individuals depending on their vaccination status might be



233 observable.<sup>36</sup> Finally, there was only little evidence for the association of transport-related PA  
234 and sedentary time with vaccination status. This was expected since for these PA patterns  
235 safety measures equally apply to all groups.

236

#### 237 *4.2 Association between vaccination status and contribution of PA category to TPA*

238 To better understand the origin of alteration in TPA, it is useful to analyze the contribution of  
239 the respective PA categories to TPA. The relative contributions of PA categories, i.e. work-,  
240 leisure time-, and transport-related PA, were not different between groups. This indicates that  
241 the between-group differences seen in TPA might not be due to a single PA category. It thus  
242 seems relevant to examine all categories of PA when searching for the main contributor to  
243 between-group differences in TPA.

244

#### 245 *4.3 Association between vaccination status and sporting behavior*

246 Interestingly, despite the role of vaccination status in TPA, VPA, and MPA, sporting behavior  
247 seems not to be associated with vaccination status except jogging as the most frequent type of  
248 intensive sport. Individuals with COVID-19 in the past 6 months reported to engage more  
249 frequently in jogging than the other groups. This aligns with the finding of those with COVID-  
250 19 in the past performing more MPA than fully vaccinated individuals. Jogging is among the  
251 most popular types of sports in Europe, is easily accessible, requires minimal equipment, and  
252 does not necessitate contact with others.<sup>37</sup> For those reasons it might be the go-to activity for  
253 getting back in shape post-infection. On the contrary, since the other groups did not differ, this  
254 could mean that their sporting behavior is more diverse. Yet, detailed conclusions are difficult  
255 to draw from the present data. Detailed data on the time spent in the respective types of sports  
256 would be valuable.

257

#### 258 *4.4 Association between vaccination status and barriers to PA*

259 Barriers to PA describe what prevents individuals from being physically active. Interestingly,  
260 there was only little evidence for between-group differences regarding the COVID-19-specific  
261 barriers. Yet, unvaccinated individuals tended to report ‘COVID-19 safety measures’ more  
262 often, whereas among individuals with COVID-19 in the past, ‘tiredness’ and ‘consequences  
263 of a disease’ tended to be more frequently reported. The latter two barriers are in line with data  
264 on post-COVID-19 syndrome.<sup>34, 35</sup> However, the lack of evidence may be explained by the  
265 circumstances the survey was conducted in – low occurrence of infections, mild safety  
266 measures, and for instance in Switzerland no vaccination certificate mandate at the time.<sup>38</sup>



267

#### 268 *4.5 Sensitivity analyses*

269 We found that the association between PA and vaccination status was not altered by the country  
270 of residence. This was expected. Safety measures<sup>15</sup>, the fraction of fully-vaccinated  
271 individuals, as well as the number of new infections was similar in all three countries.<sup>16</sup>  
272 However, the country of residence may be relevant in survey round 2 that is being conducted  
273 at the moment (December 2021). At the time, there was a countrywide lockdown in Austria  
274 whereas this was not the case for Germany and Switzerland.<sup>15</sup> The present transnational study  
275 will be of great value in such situations.

276

#### 277 *4.6 Strengths and limitations*

278 The main strength of this study is its transnational prospective study design. It allows observing  
279 the impact of the situation at the time (e.g. differences in severity of implemented safety  
280 measures and number of new infections) between the respective countries on the  
281 aforementioned associations. Together with the results of survey round 2 and 3, the influence  
282 of different time points (i.e. August & December 2021, August 2022) on these associations can  
283 likewise be observed. Another strength is the application of innovative statistical methods (i.e.  
284 two-step procedure<sup>26-28</sup>) in the area of sports medicine.

285 Several potential limitations should be discussed. Due to the design of the study, the group  
286 sizes were not balanced. This may be a reason for not reaching statistical significance in some  
287 of the post-hoc analyses. Moreover, the study cohort may likely not be representative of the  
288 German-speaking general population, especially because of the high percentage of female  
289 participants and individuals with a university degree. Nonetheless, the results are adaptable to  
290 a population of well-educated individuals.

291

## 292 **5. Conclusion**

293 To the best of our knowledge, this is the first study to investigate the association of vaccination  
294 status with PA. We showed that COVID-19 vaccination status is associated with PA levels in  
295 German-speaking countries and should thus be assessed in future research in this pandemic  
296 situation. There was little evidence for a clear contribution of a single PA category (work,  
297 leisure time, or transport) to changes in TPA. This highlights the need for assessing PA in its  
298 wide spectrum. Sporting behavior may not be associated with vaccination status. Only jogging  
299 was more frequently reported in individuals recovering from COVID-19 as it may be an easily

300 accessible activity to get back in shape. Finally, barriers to PA were not significantly different  
301 between groups which may be explained by the low number of COVID-19 cases and mild  
302 safety measures at the time of the survey.

303 We recommend that COVID-19 vaccination status should be considered as a potential  
304 moderator for PA patterns in both future research and the development of PA guidelines in  
305 pandemic times. It remains to be seen whether these associations change in winter with likely  
306 stricter safety measures in place and rising numbers of infections. Survey round 2 of the COR-  
307 PHYS-Q study will investigate this.

308

### 309 **Acknowledgements**

310 The authors thank everyone that contributed to distributing the link to the questionnaire. Also,  
311 we are grateful for all individuals that participated in the COR-PHYS-Q study. No funding was  
312 received. Participants and the public were not involved in the planning or conduct of this study.

313

### 314 **Author's contributions**

315 FS conceptualized the study, defined the methods, collected the data, was responsible for data  
316 curation, analyzed and interpreted the data, and wrote the original draft of the manuscript. HTB  
317 contributed to collecting the data, writing, and revised the manuscript. MF contributed to  
318 collecting the data and revised the manuscript. UT contributed to define the methods and  
319 revised the manuscript. AST conceptualized the study, defined the methods, collected the data,  
320 and revised the manuscript. All authors have read and approved the final version and agree  
321 with the order of presentation of the authors.

322

### 323 **Competing interests**

324 None of the authors has any conflict to declare.

325

## 326 6. References

- 327 1. Stockwell S, Trott M, Tully M, et al. Changes in physical activity and sedentary  
328 behaviours from before to during the COVID-19 pandemic lockdown: A systematic  
329 review. *BMJ Open Sport Exerc Med* 2021;**7**:e000960.
- 330 2. Lee IM, Shiroma EJ, Lobelo F, Puska P, Blair SN, Katzmarzyk PT. Effect of physical  
331 inactivity on major non-communicable diseases worldwide: An analysis of burden of  
332 disease and life expectancy. *Lancet* 2012;**380**:219-29.
- 333 3. Bull FC, Al-Ansari SS, Biddle S, et al. World Health Organization 2020 guidelines on  
334 physical activity and sedentary behaviour. *Br J Sports Med* 2020;**54**:1451.
- 335 4. Ding D, Lawson KD, Kolbe-Alexander TL, et al. The economic burden of physical  
336 inactivity: A global analysis of major non-communicable diseases. *Lancet*  
337 2016;**388**:1311-24.
- 338 5. World Health Organization. *Stay physically active during self-quarantine*; 2021.  
339 Available from: [https://www.euro.who.int/en/health-topics/health-](https://www.euro.who.int/en/health-topics/health-emergencies/coronavirus-COVID-19/publications-and-technical-guidance/noncommunicable-diseases/stay-physically-active-during-self-quarantine)  
340 [emergencies/coronavirus-COVID-19/publications-and-technical-](https://www.euro.who.int/en/health-topics/health-emergencies/coronavirus-COVID-19/publications-and-technical-guidance/noncommunicable-diseases/stay-physically-active-during-self-quarantine)  
341 [guidance/noncommunicable-diseases/stay-physically-active-during-self-quarantine.](https://www.euro.who.int/en/health-topics/health-emergencies/coronavirus-COVID-19/publications-and-technical-guidance/noncommunicable-diseases/stay-physically-active-during-self-quarantine)  
342 [Accessed 09.12.2021].
- 343 6. National Center for Chronic Disease Prevention and Health Promotion. *How to be*  
344 *physically active while social distancing*; 2021. Available from:  
345 [https://www.cdc.gov/physicalactivity/how-to-be-physically-active-while-social-](https://www.cdc.gov/physicalactivity/how-to-be-physically-active-while-social-distancing.html)  
346 [distancing.html](https://www.cdc.gov/physicalactivity/how-to-be-physically-active-while-social-distancing.html). [Accessed 09.12.2021].
- 347 7. Laddu DR, Lavie CJ, Phillips SA, Arena R. Physical activity for immunity protection:  
348 Inoculating populations with healthy living medicine in preparation for the next  
349 pandemic. *Prog Cardiovasc Dis* 2021;**64**:102-4.
- 350 8. Sallis R, Young DR, Tartof SY, et al. Physical inactivity is associated with a higher  
351 risk for severe COVID-19 outcomes: A study in 48 440 adult patients. *Br J Sports*  
352 *Med* 2021;**55**:1099-105.
- 353 9. Campbell JP, Turner JE. Debunking the myth of exercise-induced immune  
354 suppression: Redefining the impact of exercise on immunological health across the  
355 lifespan. *Front Immunol* 2018;**9**. doi: 10.3389/fimmu.2018.00648
- 356 10. Polack FP, Thomas SJ, Kitchin N, et al. Safety and efficacy of the BNT162b2 mRNA  
357 COVID-19 vaccine. *New Engl J Med* 2020;**383**:2603-15.
- 358 11. Voysey M, Clemens SAC, Madhi SA, et al. Safety and efficacy of the ChAdOx1  
359 nCoV-19 vaccine (AZD1222) against SARS-CoV-2: An interim analysis of four  
360 randomised controlled trials in brazil, south africa, and the uk. *Lancet* 2021;**397**:99-  
361 111.
- 362 12. Mahase E. COVID-19: Moderna applies for US and EU approval as vaccine trial  
363 reports 94.1% efficacy. *BMJ* 2020;**371**:m4709.
- 364 13. Mathieu E, Ritchie H, Ortiz-Ospina E, et al. A global database of COVID-19  
365 vaccinations. *Nat Hum Behav* 2021;**5**:947-53.
- 366 14. Ghram A, Moalla W, Lavie CJ. Vaccine and physical activity in the era of COVID-19  
367 pandemic. *Prog Cardiovasc Dis* 2021;**67**:33-4.
- 368 15. Hale T, Sam W., Anna P., Toby P., K. B. Oxford COVID-19 government response  
369 tracker. In: Government BSo, ed.: Blavatnik School of Government; 2020.
- 370 16. Dong E, Du H, Gardner L. An interactive web-based dashboard to track COVID-19 in  
371 real time. *Lancet Infect Dis* 2020;**20**:533-4.
- 372 17. Cheval B, Sivaramakrishnan H, Maltagliati S, et al. Relationships between changes in  
373 self-reported physical activity, sedentary behaviour and health during the coronavirus  
374 (COVID-19) pandemic in France and Switzerland. *J Sports Sci* 2020;**39**:699-704.

- 375 18. Harris PA, Taylor R, Minor BL, et al. The redcap consortium: Building an  
376 international community of software platform partners. *J Biomed Inform*  
377 2019;**95**:103208.
- 378 19. Harris PA, Taylor R, Thielke R, Payne J, Gonzalez N, Conde JG. Research electronic  
379 data capture (REDCap) – a metadata-driven methodology and workflow process for  
380 providing translational research informatics support. *J Biomed Inform* 2009;**42**:377-  
381 81.
- 382 20. Wanner M, Hartmann C, Pestoni G, Martin BW, Siegrist M, Martin-Diener E.  
383 Validation of the global physical activity questionnaire for self-administration in a  
384 european context. *BMJ Open Sport Exerc Med* 2017;**3**:e000206.
- 385 21. World Health Organization. *Global Physical Activity Questionnaire (GPAQ): Analysis*  
386 *guide*; Available from:  
387 [https://www.who.int/ncds/surveillance/steps/resources/GPAQ\\_Analysis\\_Guide.pdf](https://www.who.int/ncds/surveillance/steps/resources/GPAQ_Analysis_Guide.pdf).  
388 [Accessed 01.10.2021].
- 389 22. Schwendinger F, Wagner J, Infanger D, Schmidt-Trucksäss A, Knaier R.  
390 Methodological aspects for accelerometer-based assessment of physical activity in  
391 heart failure and health. *BMC Med Res Methodol* 2021;**21**:251.
- 392 23. Garber CE, Blissmer B, Deschenes MR, et al. American college of sports medicine  
393 position stand. Quantity and quality of exercise for developing and maintaining  
394 cardiorespiratory, musculoskeletal, and neuromotor fitness in apparently healthy  
395 adults: Guidance for prescribing exercise. *Med Sci Sports Exerc* 2011;**43**:1334-59.
- 396 24. Reichert FF, Barros AJD, Domingues MR, Hallal PC. The role of perceived personal  
397 barriers to engagement in leisure-time physical activity. *Am J Public Health*  
398 2007;**97**:515-9.
- 399 25. R Core Team. *R: A language and environment for statistical computing*; 2021.  
400 Available from: <https://www.R-project.org/>.
- 401 26. Min Y, Agresti A. Modeling nonnegative data with clumping at zero: A survey. *J of*  
402 *Iran Stat Soc* 2002;**1**:7-33.
- 403 27. Boulton AJ, Williford A. Analyzing skewed continuous outcomes with many zeros: A  
404 tutorial for social work and youth prevention science researchers. *J Soc Soc Work and*  
405 *Res* 2018;**9**:721-40.
- 406 28. Neelon B, O'Malley AJ, Smith VA. Modeling zero-modified count and  
407 semicontinuous data in health services research part 2: Case studies. *Stat Med*  
408 2016;**35**:5094-112.
- 409 29. Shrier I, Platt RW. Reducing bias through directed acyclic graphs. *BMC Med res*  
410 *Methodol* 2008;**8**:70.
- 411 30. Harrell FE. *Regression modeling strategies: With applications to linear models,*  
412 *logistic and ordinal regression, and survival analysis*. 2nd ed.: Springer; 2016.
- 413 31. Benjamini Y, Hochberg Y. Controlling the false discovery rate: A practical and  
414 powerful approach to multiple testing. *J R Stat Soc Series B* 1995;**57**:289-300.
- 415 32. Burtscher J, Burtscher M, Millet GP. The central role of mitochondrial fitness on  
416 antiviral defenses: An advocacy for physical activity during the COVID-19 pandemic.  
417 *Redox Biol* 2021;**43**:101976.
- 418 33. Burtscher J, Millet GP, Burtscher M. Low cardiorespiratory and mitochondrial fitness  
419 as risk factors in viral infections: Implications for COVID-19. *Br J Sports Med*  
420 2020;**55**:413-15.
- 421 34. Nehme M, Braillard O, Chappuis F, Courvoisier DS, Guessous I. Prevalence of  
422 symptoms more than seven months after diagnosis of symptomatic COVID-19 in an  
423 outpatient setting. *Ann Intern Med* 2021;**174**:1252-60.

- 424 35. Gebhard CE, Sütsch C, Bengs S, et al. Sex- and gender-specific risk factors of post-  
425 COVID-19 syndrome: A population-based cohort study in Switzerland. *medRxiv*  
426 2021:2021.06.30.21259757. doi: 10.1101/2021.06.30.21259757
- 427 36. Lavie CJ, Ozemek C, Carbone S, Katzmarzyk PT, Blair SN. Sedentary behavior,  
428 exercise, and cardiovascular health. *Circ Res* 2019;**124**:799-815.
- 429 37. Hulteen RM, Smith JJ, Morgan PJ, et al. Global participation in sport and leisure-time  
430 physical activities: A systematic review and meta-analysis. *Prev Med* 2017;**95**:14-25.
- 431 38. Federal Office of Public Health (FOPH). *COVID-19 Switzerland - information on the*  
432 *current situation, as of 10 September 2021*; 2021. Available from:  
433 <https://www.covid19.admin.ch/en/epidemiologic/hosp>. [Accessed 09.09.2021].  
434

Vaccination status and physical activity

435 **Tables**

436

437 Table 1

438 Age-adjusted MET-values for moderate and vigorous physical activity.

| Age groups | METs     |          |
|------------|----------|----------|
|            | Moderate | Vigorous |
| 18-39      | 7        | 9        |
| 40-64      | 6        | 7.5      |
| ≥65        | 4.5      | 5.75     |

439 Abbreviations: MET = metabolic equivalent of task (1 MET = 3.5 mL·kg<sup>-1</sup>·min<sup>-1</sup>).

440

441 Table 2

442 Subject characteristics stratified by COVID-19 vaccination status.

| Variable                    | Total sample<br>(n = 1516) | Unvaccinated<br>(n = 157) | First short<br>(n = 48) | Fully vaccinated (n = 1269) | Recovered<br>(n = 42) |
|-----------------------------|----------------------------|---------------------------|-------------------------|-----------------------------|-----------------------|
| Female sex                  | 70.1                       | 72.0                      | 70.8                    | 69.8                        | 71.4                  |
| Age, years <sup>s</sup>     | 41 (33)                    | 38 (30)                   | 32 (37)                 | 42 (33)                     | 38 (30)               |
| BMI, kg·m <sup>-2</sup>     | 24.0 ± 4.2                 | 23.5 ± 3.9                | 22.6 ± 3.3              | 24.1 ± 4.3                  | 24.3 ± 3.8            |
| <b>Country of residence</b> |                            |                           |                         |                             |                       |
| Switzerland                 | 38.1                       | 43.3                      | 35.4                    | 37.4                        | 42.9                  |
| Germany                     | 38.0                       | 28.7                      | 35.4                    | 39.3                        | 35.7                  |
| Austria                     | 23.8                       | 28.0                      | 29.2                    | 23.2                        | 21.4                  |
| <b>Level of education</b>   |                            |                           |                         |                             |                       |
| Vocational school           | 16.4                       | 21.2                      | 16.7                    | 15.7                        | 11.9                  |
| Secondary school            | 11.8                       | 14.6                      | 12.5                    | 11.1                        | 21.4                  |
| A-levels                    | 21.0                       | 21.0                      | 29.1                    | 20.6                        | 23.8                  |
| University                  | 50.7                       | 41.4                      | 41.7                    | 52.4                        | 42.9                  |
| <b>Civil status</b>         |                            |                           |                         |                             |                       |
| Single                      | 32.1                       | 34.4                      | 39.6                    | 31.5                        | 38.1                  |
| Married                     | 39.5                       | 40.8                      | 33.3                    | 39.3                        | 45.2                  |
| Divorced                    | 5.5                        | 8.9                       | 8.3                     | 5.1                         | 2.4                   |
| Widowed                     | 2.7                        | 1.3                       | 2.1                     | 2.9                         | 2.4                   |
| Relationship                | 12.9                       | 14                        | 16.7                    | 21                          | 11.9                  |
| Smoking, yes                | 7.7                        | 7.6                       | 2.1                     | 7.8                         | 11.9                  |
| Living w/ others, yes       | 76.5                       | 80.3                      | 79.2                    | 75.9                        | 78.6                  |



Vaccination status and physical activity

443 Data are presented as mean ± SD or relative frequencies unless denoted otherwise. The education levels ‘primary  
444 school’ and ‘vocational school’ were combined as the former made up only 0.5% in the full sample.  
445 Abbreviations: \$ = median (interquartile range); BMI = body-mass index.

446  
447 Table 3

448 Two-part models for the association of physical activity patterns with vaccination status.

| Group comparisons            | Logistic regression |              |         | Linear model |              |              |
|------------------------------|---------------------|--------------|---------|--------------|--------------|--------------|
|                              | OR (no PA)          | 95% CI       | p-value | Ratio        | 95% CI       | p-value      |
| <b>TPA</b>                   |                     |              |         |              |              | <b>0.011</b> |
| UV vs. 1V                    | -                   | -            | -       | 1.34         | 0.82 to 2.2  | 0.409        |
| UV vs. FV                    | -                   | -            | -       | 1.22         | 0.99 to 1.51 | 0.076        |
| UV vs. R                     | -                   | -            | -       | 1.05         | 0.69 to 1.58 | 0.991        |
| 1V vs. FV                    | -                   | -            | -       | 0.91         | 0.58 to 1.44 | 0.946        |
| 1V vs. R                     | -                   | -            | -       | 0.78         | 0.44 to 1.39 | 0.679        |
| FV vs. R                     | -                   | -            | -       | 0.86         | 0.60 to 1.24 | 0.703        |
| <b>VPA<sup>b</sup></b>       |                     |              | 0.500   |              |              | <b>0.015</b> |
| UV vs. 1V                    | 0.56                | 0.21 to 1.46 | 0.395   | 1.60         | 0.99 to 2.58 | 0.057        |
| UV vs. FV                    | 0.89                | 0.52 to 1.50 | 0.932   | 1.09         | 0.86 to 1.39 | 0.763        |
| UV vs. R                     | 0.99                | 0.34 to 2.89 | 1.000   | 1.2          | 0.82 to 1.75 | 0.596        |
| 1V vs. FV                    | 1.59                | 0.68 to 3.72 | 0.488   | 0.68         | 0.45 to 1.05 | 0.104        |
| 1V vs. R                     | 1.77                | 0.50 to 6.28 | 0.640   | 0.75         | 0.45 to 1.26 | 0.479        |
| FV vs. R                     | 1.12                | 0.43 to 2.94 | 0.991   | 1.10         | 0.80 to 1.50 | 0.865        |
| <b>MPA<sup>c</sup></b>       |                     |              | 0.089   |              |              | <b>0.001</b> |
| UV vs. 1V                    | 0.32                | 0.09 to 1.17 | 0.057   | 0.75         | 0.44 to 1.29 | 0.520        |
| UV vs. FV                    | 0.5                 | 0.21 to 1.20 | 0.763   | 1.23         | 0.96 to 1.57 | 0.145        |
| UV vs. R                     | 0.42                | 0.10 to 1.70 | 0.596   | 0.74         | 0.46 to 1.17 | 0.320        |
| 1V vs. FV                    | 1.59                | 0.57 to 4.44 | 0.104   | 1.62         | 1.00 to 2.65 | 0.053        |
| 1V vs. R                     | 1.32                | 0.29 to 5.98 | 0.479   | 0.97         | 0.52 to 1.83 | 1.000        |
| FV vs. R                     | 0.83                | 0.26 to 2.64 | 0.865   | 0.60         | 0.40 to 0.90 | <b>0.009</b> |
| <b>Transport<sup>d</sup></b> |                     |              | 0.067   |              |              | 0.431        |
| UV vs. 1V                    | 2.97                | 0.90 to 9.79 | 0.086   | 1.26         | 0.86 to 1.85 | 0.383        |
| UV vs. FV                    | 1.07                | 0.67 to 1.71 | 0.981   | 1.15         | 0.91 to 1.46 | 0.404        |
| UV vs. R                     | 0.92                | 0.36 to 2.37 | 0.996   | 1.17         | 0.72 to 1.91 | 0.839        |
| 1V vs. FV                    | 0.36                | 0.12 to 1.11 | 0.088   | 0.91         | 0.66 to 1.26 | 0.880        |
| 1V vs. R                     | 0.31                | 0.08 to 1.24 | 0.131   | 0.93         | 0.54 to 1.58 | 0.982        |
| FV vs. R                     | 0.86                | 0.37 to 2.02 | 0.968   | 1.02         | 0.65 to 1.59 | 1.000        |

449 <sup>a</sup> n = 1478, <sup>b</sup> n = 1510, <sup>c</sup> n = 1260, <sup>d</sup> n = 1510. Abbreviations: FV = fully vaccinated; MPA = moderate physical  
450 activity; OR = odds ratio; R = recovered from coronavirus disease 2019 within the last 6 months; TPA = total  
451 physical activity; Transport = transport-related physical activity; UV = unvaccinated; 1V = first-shot; 95% CI =  
452 95% confidence interval.

453

## Vaccination status and physical activity

454 Table 4

455 Linear model for sedentary time with between-group comparisons.

---

| <b>Group comparisons</b> | <b>Estimate</b> | <b>95% CI</b>    | <b>p-value</b> |
|--------------------------|-----------------|------------------|----------------|
|                          |                 |                  | 0.276          |
| UV vs. 1V                | 7.82            | -70.40 to 86.03  | .994           |
| UV vs. FV                | -33.40          | -73.65 to 6.85   | .139           |
| UV vs. R                 | -19.74          | -110.09 to 70.60 | .940           |
| 1V vs. FV                | -41.22          | -111.16 to 28.72 | .418           |
| 1V vs. R                 | -27.56          | -134.49 to 79.37 | .907           |
| FV vs. R                 | 13.66           | -69.61 to 96.94  | .97            |

---

456 Abbreviations: FV = fully vaccinated; R, recovered from coronavirus disease 2019 within the last 6 months; UV

457 = unvaccinated; 1V = first-shot; 95% CI = 95% confidence interval.

458

459 **Figures**  
460

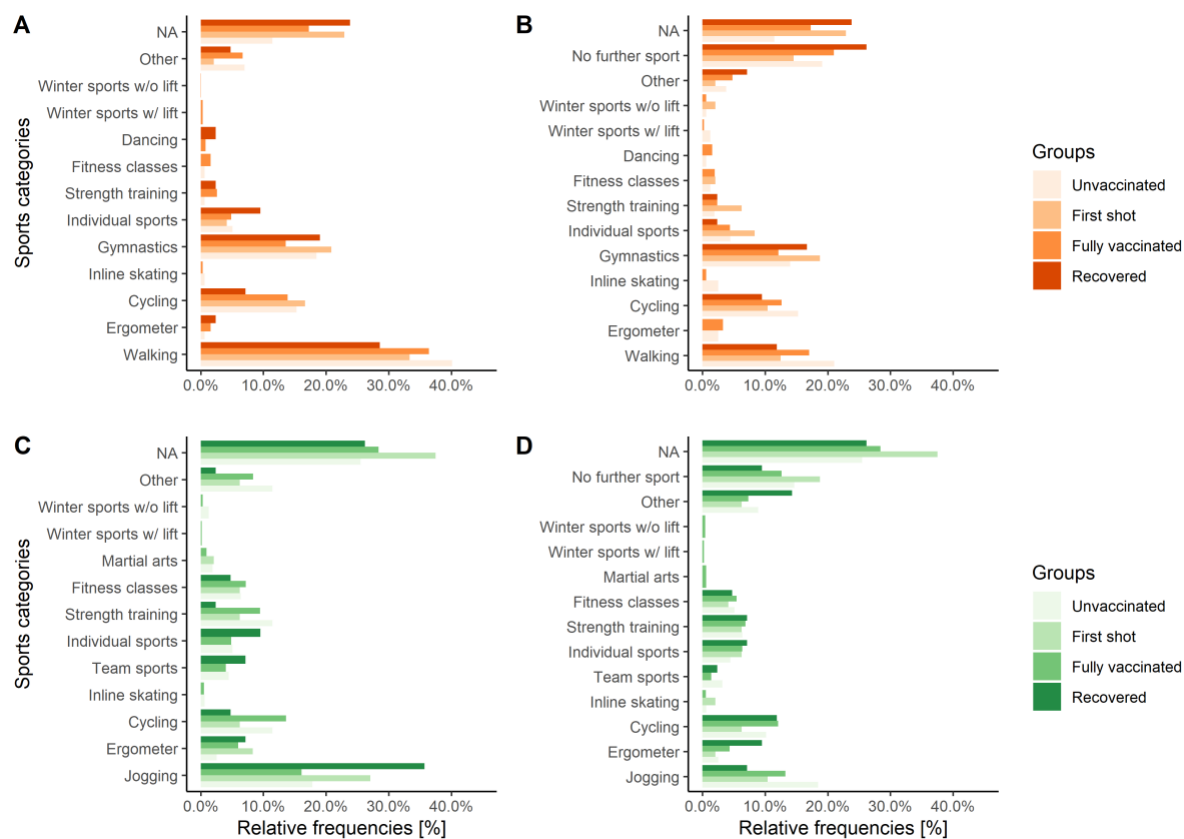

461  
462 Fig 1. Frequencies of types of sports. A and B represent the most and second most frequent types of intensive  
463 sports, whereas C and D show the most- and second-most frequent types of moderate sports. No multiple choices  
464 per panel were possible. NA = no sports.  
465

Vaccination status and physical activity

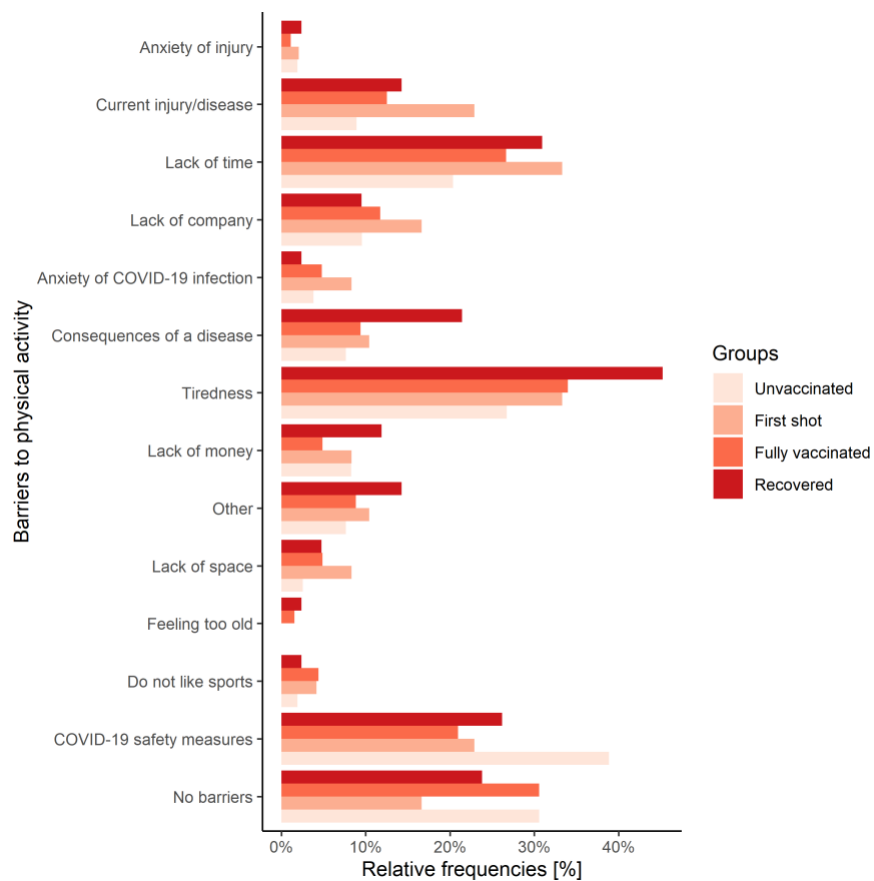

466  
 467 Fig 2. Frequencies of barriers to physical activity stratified by COVID-19 vaccination status. Multiple choices  
 468 were possible. Abbreviations: COVID-19 = coronavirus disease 2019.  
 469

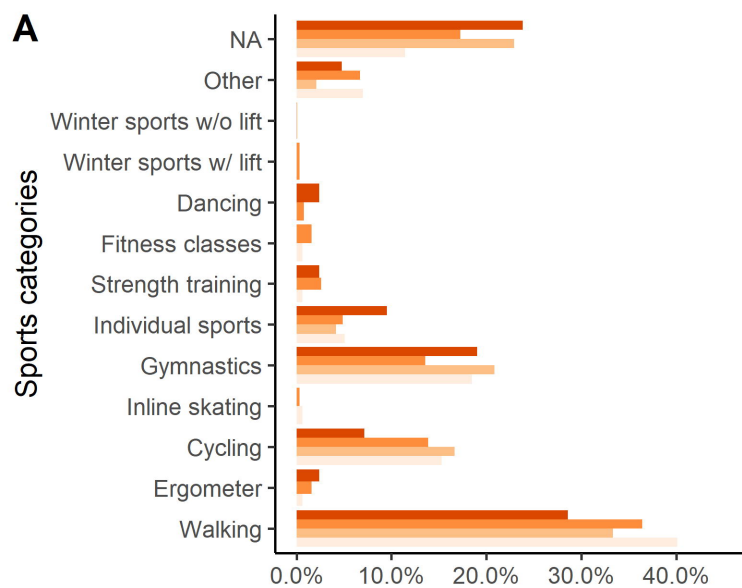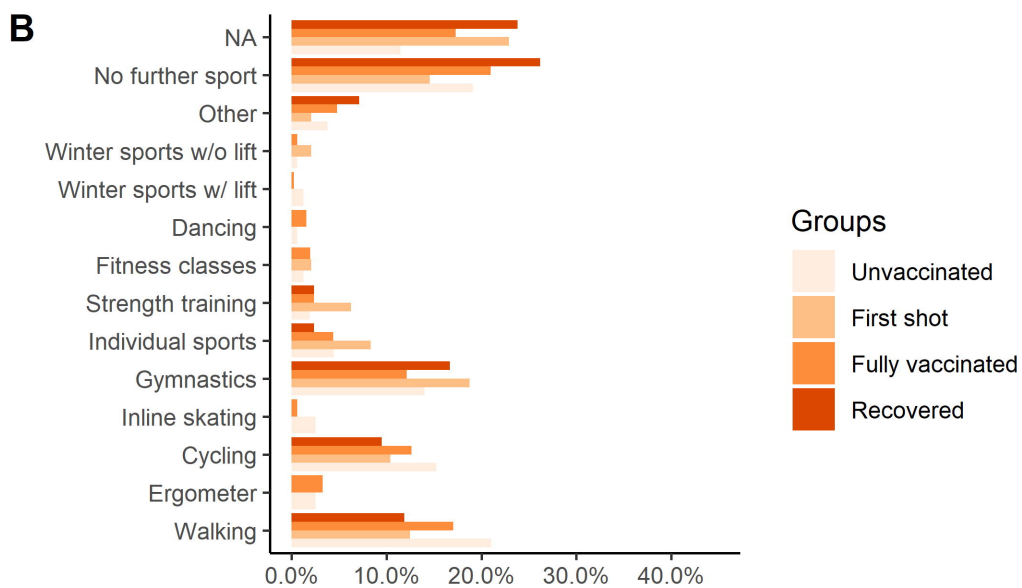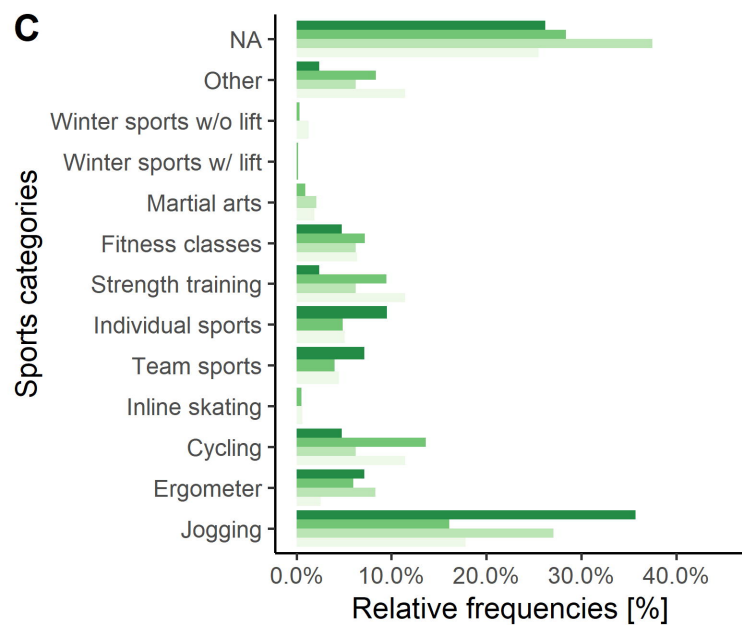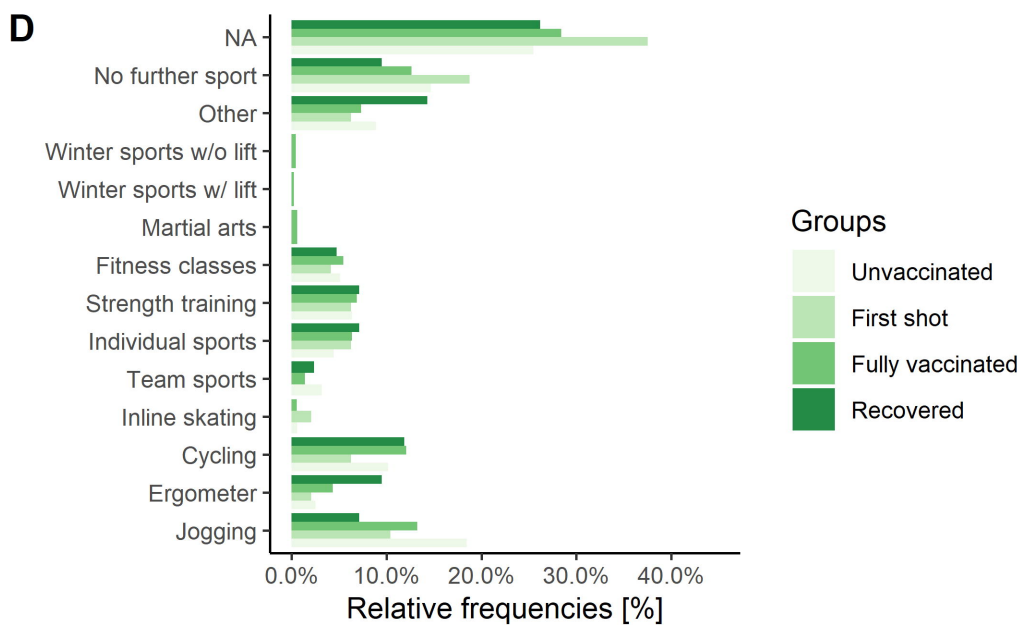

Barriers to physical activity

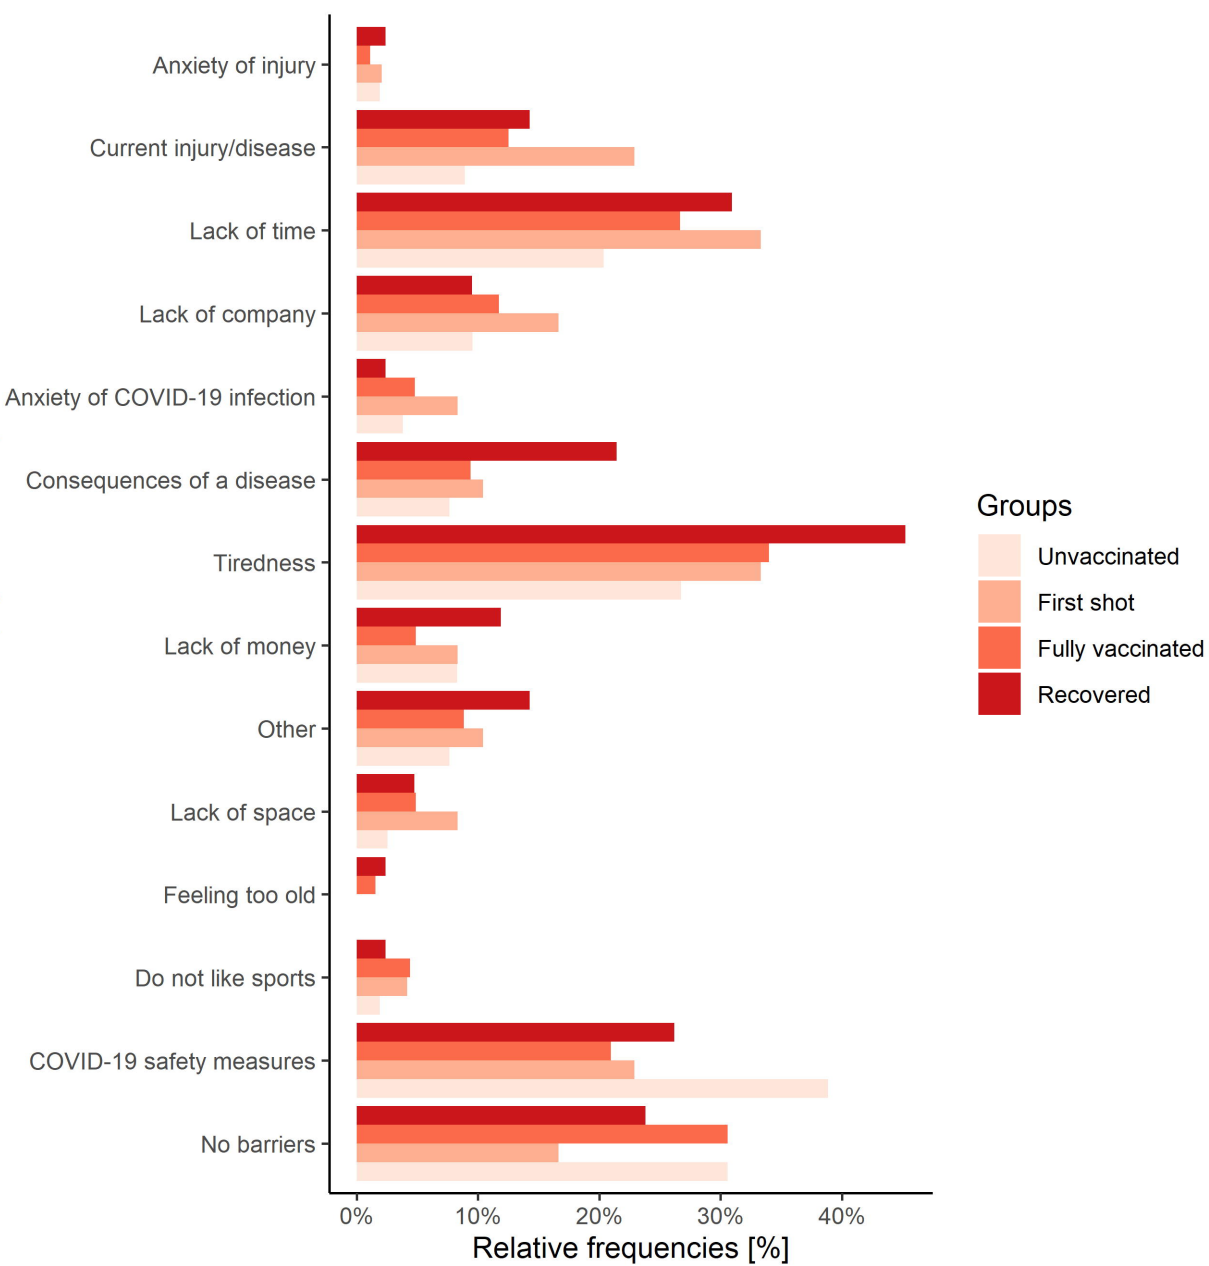

Source: https://medrxiv.org/content/10.1101/2022.01.01.21268576v1.full.pdf
